# GeneDMRs: an R package for Gene-based Differentially Methylated Regions analysis

Xiao Wang<sup>1\*</sup>, Dan Hao<sup>2,3</sup>, Haja N. Kadarmideen<sup>1\*</sup>

1. *Quantitative Genomics, Bioinformatics and Computational Biology Group, Department of Applied Mathematics and Computer Science, Technical University of Denmark, 2800, Kongens Lyngby, Denmark*

2. *College of Animal Science and Technology, Northwest A&F University, 712100, Yangling, Shannxi, China*

3. *Department of Molecular Biology and Genetics, Aarhus University, 8000, Aarhus C, Denmark*

\*Correspondence: [hajak@dtu.dk](mailto:hajak@dtu.dk)

## 29 **Abstract**

30 DNA methylation in gene or promoter or gene body could restrict/promote the gene transcription.  
31 Moreover, methylation in the gene regions along with CpG island regions could modulate the  
32 transcription to undetectable gene expression levels. Therefore, it is necessary to investigate the  
33 methylation levels within the gene, gene body, CpG island regions and their overlapped regions and  
34 then identify the gene-based differentially methylated regions (GeneDMRs). Here, R package  
35 *GeneDMRs* aims to facilitate computing gene based methylation rate using next generation  
36 sequencing (NGS)-based methylome data. The user-friendly R package *GeneDMRs* is presented to  
37 analyze the methylation levels in each gene/promoter/exon/intron/CpG island/CpG island shore or  
38 each overlapped region (e.g., gene-CpG island/promoter-CpG island/exon-CpG island/intron-CpG  
39 island/gene-CpG island shore/promoter-CpG island shore/exon-CpG island shore/intron-CpG island  
40 shore). Here, we used the public reduced representation bisulfite sequencing (RRBS) data of mouse  
41 (GSE62392) for evaluating software and found novel biologically significant results to supplement  
42 the previous research. The R package *GeneDMRs* can facilitate computing gene based methylation  
43 rate to interpret complex interplay between methylation levels and gene expression differences or  
44 similarities across physiological conditions or disease states.

45

46

47

48

49

50

51

52

53

54

55

56

## 57 **1. Introduction**

58 Generally, gene expression is restricted by DNA methylation. However, the presence of methylation  
59 in gene or promoter or gene body could result in promotion of gene transcription. Irizarry et al. (2009)  
60 revealed the correlation between substantial portion of DNA methylation sites and gene expression  
61 along the genome. DNA methylation in promoters usually restricts the genes in a long-term  
62 stabilization of repressed states, while most gene bodies are also extensively methylated in different  
63 status; therefore, methylation of such regions can be the potential therapeutic targets (Jones, 2012;  
64 Yang et al., 2014). CpG islands, regions of high density of DNA methylation of cytosine and guanine  
65 dinucleotides (CpGs), are playing an important role in gene regulation and transcriptional repression  
66 (Goldberg et al., 2007). Moreover, the shore regions beyond CpG islands are also involved in  
67 modulating gene expression (Irry et al., 2009; Doi et al., 2009).

68 Identifying causal relationships via genotype–phenotype correlations is a substantial challenge and  
69 many studies across life sciences try to integrate multi-omics datasets in that effort (Suravajhala et al.,  
70 2016). Recently, one of the largest genetic study investigated global gene expression and DNA  
71 methylation patterns in 265 human skeletal muscle biopsies from the FUSION study with > 7 million  
72 genetic variants. This integrated approach led to potential causal mechanisms for eight physiological  
73 traits: height, waist, weight, waist–hip ratio, body mass index, fasting serum insulin, fasting plasma  
74 glucose, and type 2 diabetes (Taylor et al., 2019). This underlines the importance of having gene-  
75 based methylation rates to integrate with differential expression or co-expression across physiological  
76 and phenotypic or disease states.

77 Studying DNA methylation patterns in biological samples using next generation sequencing (NGS)  
78 methods are becoming increasingly common. There are several tools available to detect differentially  
79 methylated cytosine (DMC) (e.g., R package *IMA* (Wang et al., 2012), *MethylKit* (Akalin et al.,  
80 2012)) or differentially methylated region (DMR) (e.g., R package *ELMER* (Silva et al., 2018),  
81 *MethylMix* (Gevaert, 2015; Cedoz et al., 2018), *Minfi* (Aryee et al., 2014), *MIRA* (Lawson et al.,  
82 2018), *RnBeads* (Assenov et al., 2014; Müller et al., 2019)). These packages mainly focus on the  
83 specific differentially methylated regions like genes (DMGs) from cancer dataset (Gevaert, 2015;  
84 Cedoz et al., 2018) or only promoters (DMPs) (Assenov et al., 2014; Müller et al., 2019). However,  
85 detections of DMR based on gene body features associated with CpG islands are scarce, such as the  
86 DMRs in all exons (DMEs) and introns (DMIs) or a specific exon and intron. To the best of our  
87 knowledge, there are no tools that detect the DMP/DME/DMI/DMG associated with CpG  
88 islands/CpG island shores. We present here a user-friendly R package *GeneDMRs*  
89 (<https://github.com/xiaowangCN/GeneDMRs>) to facilitate computing gene based methylation rate  
90 using next generation sequencing (NGS) based methylome data. *GeneDMRs* analyzes the methylation  
91 levels in each gene/promoter/exon/intron/CpG island/CpG island shore or each overlapped region

92 (e.g., gene/promoter/exon/intron CpG island and gene/promoter/exon/intron CpG island shore). We  
93 evaluated the R package *GeneDMRs* using the publicly available reduced representation bisulfite  
94 sequencing (RRBS) data from mouse (Accession ID: GSE62392).

95

## 96 **2. Materials and Methods**

### 97 **2.1 Data structure in DNA methylation**

98 Genome-wide DNA methylation analysis are mainly based on three approaches, i.e., enzyme  
99 digestion, affinity enrichment and bisulfite conversion (Laird, 2010). Whole genome bisulfite  
100 sequencing (WGBS) aims to find the whole methylome (Frommer et al., 1992) while reduced  
101 representation bisulfite sequencing (RRBS) primarily focuses on the enrichment of CpG-rich regions  
102 by recognizing the site CmCGG after restriction enzyme *MspI* digestion (Meissner et al., 2005), but  
103 both techniques rely on bisulfite conversion. From WGBS or RRBS data, cytosine site information  
104 (e.g. chromosome and position) and its methylation status can be obtained using available  
105 bioinformatics tools. *GeneDMRs* package can directly use the resulting methylation *coverage* file  
106 (i.e., *bismark.cov*) from *Bismark* software or similar file with chromosome, start position, end  
107 position, methylation percentage, number of methylated read and number of unmethylated read (five  
108 or six columns). With such dataset, we provide below the statistical framework to compute gene-  
109 based methylation rate.

### 110 **2.2 Gene-based DMRs and analysis workflow**

111 The gene-based regions could be divided into single window, gene, promoter, exon, intron, CpG  
112 island and CpG island shore and their overlapped feature regions including gene-CpG island, gene-  
113 CpG island shore, promoter-CpG island, promoter-CpG island shore, exon-CpG island, exon-CpG  
114 island shore, intron-CpG island and intron-CpG island shore (Figure 1).

115 The methylation mean of a cytosine site by weighting for one group (a case or control) is calculated by  
116 (1):

$$117 \sum_{i=1}^n \frac{MR_i}{TR_i} * W_i \text{ and } W_i = \frac{TR_i}{\sum_{i=1}^n TR_i} \dots \dots \dots (1),$$

118 where  $MR_i$  and  $TR_i$  are the methylated and total reads number at a given cytosine site of individual  $i$ ,  
119  $n$  is the total number of individuals in one group and  $W_i$  is the weight of reads of individual  $i$ .

120 For a window/gene (promoter, exon, intron)/CpGi/other overlapped region (Figure 1) of one group, the  
121 methylation mean by weighting is calculated by (2):

122 
$$\sum_{i=1}^n \frac{\sum_{j=1}^m MR_{ij}}{\sum_{j=1}^m TR_{ij}} * W_{ij} \text{ and } W_{ij} = \frac{\sum_{j=1}^m TR_{ij}}{\sum_{i=1}^n \sum_{j=1}^m TR_{ij}} \dots \dots \dots (2),$$

123 where  $MR_{ij}$  and  $TR_{ij}$  are the methylated and total reads number of the involved cytosine/DMC site  $j$   
124 at a given gene/CpGi/other region of individual  $i$ ,  $m$  is the total number of cytosine/DMC sites  
125 involved in this region,  $n$  is the total individual number of one group and  $W_{ij}$  is the weight of reads of  
126 the involved cytosine/DMC site  $j$  of individual  $i$ . For the target region, the cytosine/DMC within the  
127 region is selected, and then methylation mean of each group is calculated. Here, the DMC sites refer  
128 to the differentially methylated cytosine sites after `Significant_filter(siteall_Qvalue, qvalue = 0.01,`  
129 `methdiff = 0.05)`. Thus, if the users want to use the DMC sites for the methylation mean, they should  
130 calculate the  $Q$ -values and methylation difference by `Logic_regression()` and filter out the DMCs by  
131 `Significant_filter()` at first (Figure 2). This step was also used in our previous study for methylation  
132 difference calculation to discover hyper and hypo-methylated DMGs (Wang and Kadarmideen,  
133 2019a).

134 Logistic regression model were used to fit methylation levels with the different groups following R  
135 package *MethylKit* (Akalin et al., 2012):

136 
$$\ln\left(\frac{\pi_i}{1-\pi_i}\right) = u + \beta T_i,$$

137 where  $\pi_i$  is the methylation mean at a given window or gene-based region or site,  $u$  is the intercept,  
138 and  $T_i$  is the group indicator.

139 More categorical variables can also be incorporated in this model as the additional covariates by  
140 `Logic_regression(covariates = NULL)`. Chi-squared ( $\chi^2$ ) test was used to determine the statistical  
141 significance of methylation differences among different groups and then to achieve the  $P$ -values. To  
142 account for multiple hypothesis testing,  $P$ -values can be adjusted to  $Q$ -values by various methods,  
143 e.g., “bonferroni”, “holm” (Holm, 1979), “hochberg” (Hochberg, 1988), “hommel” (Hommel, 1988),  
144 “BH” (Hochberg, 1995), “fdr” (Hochberg, 1995) and “BY” (Benjamini and Yekutieli, 2001).

145 Differentially methylated windows (DMWs) or gene-based DMRs or DMCs (Figure 2) are mainly  
146 filtered by  $Q$ -values and methylation level differences between two groups, e.g.,  
147 `Significant_filter(qvalue = 0.01, methdiff = 0.05)`. The methylation difference can be calculated in  
148 `Logic_regression(diffgroup = c("group1", "group2"))` by selecting any two groups. The differentially  
149 methylated genes (DMGs) will be defined as the hyper/hypo-methylated gene when the methylation  
150 difference is positive/negative after case-control comparison (e.g., group2 - group1).

151 Based on gene-based regions, DMRs for specific regions could be detected, such as genes (DMGs),  
152 promoters (DMPs), exons (DMEs), introns (DMIs), CpG islands (DMCpGis), CpG island shores  
153 (DMShores) and the overlapped regions like gene-CpG islands (DMG-CpGis), gene-CpG island

154 shores (DMG-Shores), promoter-CpG islands (DMP-CpGis), promoter-CpG island shores (DMP-  
155 Shores), exon-CpG islands (DME-CpGis), exon-CpG island shores (DME-Shores), intron-CpG  
156 islands (DMI-CpGis) and intron-CpG island shores (DMI-Shores) (Figure 2). In addition, the ordinal  
157 positions of exons and introns were identified for each gene, which can be used in the further analysis,  
158 for example the correlations of methylation levels between all promoters and all first exons. The  
159 overall workflow of *GeneDMRs* package includes file input, quality control, methylation mean  
160 calculation, statistical test, significant filter and results visualization (Figure 2).

### 161 **2.3 Application to real data**

162 The reduced representation bisulfite sequencing (RRBS) data for testing the developed method was  
163 download from Gene Expression Omnibus (GEO) with the accession number GSE62392  
164 (<https://www.ncbi.nlm.nih.gov/geo/query/acc.cgi?acc=GSE62392>). The downloaded RRBS data was  
165 originally generated from RRBS of sorted common myeloid progenitor (CMP) populations that were  
166 isolated from 3 pools of G0 as control group and 2 pools of G5 as case group of mice samples (Colla  
167 et al., 2015). Mouse data used here is an example and *GeneDMRs* package is applicable to all species.  
168 We applied several pre- and post-mapping quality control (QC) to this data as follows. Adapters and  
169 reads less than 20 bases long of RRBS data were trimmed by *Trimmomatic* software (version 0.36)  
170 (Bolger et al., 2014). The clean reads were mapped to the mice reference genome by *Bowtie 2*  
171 software (version 2.3.3.1) (Langmead and Salzberg, 2012). The house mouse (*Mus musculus*)  
172 reference genome (mm10) used in this study was downloaded from the University of California Santa  
173 Cruz (UCSC) website (<http://hgdownload.soe.ucsc.edu/goldenPath/mm10/bigZips/mm10.2bit>).  
174 The *.2bit* file was subsequently converted to *.fasta* file by *twoBitToFa* software  
175 ([http://hgdownload.cse.ucsc.edu/admin/exe/linux.x86\\_64/twoBitToFa](http://hgdownload.cse.ucsc.edu/admin/exe/linux.x86_64/twoBitToFa)). Finally, read coverages of  
176 detected methylated or unmethylated cytosine sites and their methylation percentages were obtained  
177 by using *Bismark* software (version 0.19.0) (Krueger and Andrews, 2011). In this study, we only  
178 considered the numbers of methylated and unmethylated cytosines in CpG sites for each sample and  
179 the non-CpG (CHG and CHH, H representing A/C/T) sites were discarded.

### 180 **2.4 Input and quality control**

181 The resulting methylation *coverage* files from *Bismark* software of five mouse RRBS data were  
182 directly used as input in *GeneDMRs* package. The public mouse (mm10) *bed* file (i.e., *.bed*) for  
183 Reference Sequence (refseq) and CpG island (cpgi) database were downloaded from the UCSC  
184 website (<http://genome.ucsc.edu/cgi-bin/hgTables>). RefSeq and CpG island *bed* files were used as  
185 input files in *GeneDMRs* package which then can output four files (inputrefseqfile, inputcpgifile,  
186 inputgenebodyfile and inputcpgifeaturefile) by altering the *feature* parameter in the reading function,  
187 e.g., `Bedfile_read(feature = TRUE/FALSE)`. `Bedfile_read()` function divides each gene of refseq *bed* file  
188 into four gene body features (i.e., promoters, exons, introns and TSSes) and each CpG island of cpgi

189 *bed* file into two CpG island features (i.e., CpG islands and CpG island shores) based on R package  
190 *genomation* (Akalin et al., 2015). Moreover, *Bedfile\_read()* function annotates specific gene to each  
191 promoter by the further step. If the strand of one promoter is “+”/“-“, the middle position of this  
192 promoter will be the start/end position of the matched specific gene. However, for the specific genes  
193 with more than one National Center for Biotechnology Information (NCBI) ID, *GeneDMRs* package  
194 will choose the first one. For example, the adenosine A1 receptor gene (*Adora1*) has four NCBI IDs  
195 (i.e., NM\_001291930, NM\_001282945, NM\_001039510 and NM\_001008533) and only the first ID  
196 (NM\_001291930) will be chosen.

197 When a polymerase chain reaction (PCR) experiment suffers from duplication bias, some clonal reads  
198 will impair accurate determination of methylation (Akalin et al., 2012). In addition, lower read  
199 coverages (e.g., lower than 10) will cause the biases for methylation percentage calculation (Wang  
200 and Kadarmideen, 2019b). Therefore, cytosines with a percentile of read coverage higher than the  
201 99.9<sup>th</sup> and read coverages lower than 10 were discarded for the qualified reads by  
202 *Methfile\_QC*(high\_quantile = 99.9, low\_coveragenum = 10).

## 203 **2.5 Biological enrichment for the differentially methylated genes (DMGs)**

204 After *Significant\_filter()* function for DMGs, these genes with methylation differences can be used for  
205 biological enrichment. The enrichments for GO terms and pathways are analyzed and visualized by  
206 *Enrich\_plot*(enrichterm = c(“GO”, “pathway”), category = TRUE/FALSE) based on R package  
207 *clusterProfiler* (Yu et al., 2012). If the category = TRUE, the enrichment will display in hyper-  
208 methylated and hypo-methylated categories. In addition, the differentially expressed genes (DEGs)  
209 with Log fold change (LogFC) information can also be used in *Enrich\_plot*(expressionfile\_significant  
210 = NULL), then the visualized enrichment will be in four categories that are hyper/hypo-methylated and  
211 up/down-regulated genes. The up/down-regulated DEG can be defined when the LogFC is  
212 positive/negative or derived from the previous research results. Here, we use the previous results for  
213 multiple-category enrichments that are downregulated and upregulated genes in G4/G5 compared to  
214 G0 CMP (fdr = 0.05) of mice samples (<https://ars.els-cdn.com/content/image/1-s2.0-S1535610815001403-mmc2.xlsx>) (Colla et al., 2015).

216

## 217 **3. Results and Discussion**

### 218 **3.1 Comparisons of different R packages for methylation analysis**

219 Currently, a series of R packages can analyze methylation data to detect DMCs or DMRs (Table 1).  
220 Most of them are not however completely focusing on the regions in genes or within gene bodies or  
221 CpG islands and hence *GeneDMRs* package could be a complementary tool to obtain methylation



222 levels at these levels. As shown in Table 1, *ELMER* v.2 package reconstructs altered gene regulatory  
223 network (GRN) by combining enhancer methylation and gene expression (Silva et al., 2018). *IMA*  
224 (Wang et al., 2012) and *MethylKit* (Akalin et al., 2012) aim at genome-wide cytosine sites analysis for  
225 BeadChip and RRBS data, respectively. Generally, *methyAnalysis*, *MethylationArrayAnalysis* and  
226 *Minfi* are packages for specific purposes, where *methyAnalysis* applies CpG island information to  
227 visualize in the heatmap plot and *Minfi* can find the hypomethylation blocks (Aryee et al., 2014). If  
228 considering methylated genes, *MethylMix* package mainly focuses on identifying disease specific  
229 hypo and hypermethylated genes and it defines the methylation difference of a methylation state with  
230 the normal methylation state (Gevaert, 2015; Cedoz et al., 2018), while *RnBeads* package could  
231 consider the gene, gene promoter, CpG island and genomic tiling regions [15, 16]. Overall, none of  
232 these R packages works for gene components, but *GeneDMRs* package is extended to exon and intron  
233 regions, and their interactions with CpG island features. In addition, the performance of was tested in  
234 the personal computer (CPU: 2.70 GHz, RAM: 8.00 GB) comparing with *MethylKit* package (Akalin  
235 et al., 2012). For all the reference genes, *GeneDMRs* package takes around 15 minutes while gene  
236 body dataset interacted with CpG island dataset requires the longest time, thus, the performance of  
237 *GeneDMRs* package is generally related to the number of analyzed targets (Figure 3).

### 238 **3.2 Differentially methylated gene-based regions and cytosine sites**

239 In the final step, five methylation *coverage* files from *Bismark* software were used in *GeneDMRs*  
240 package and their statistical summary is listed in supplementary table 1. The *GeneDMRs* package will  
241 automatically read the files with the file name like “1\_1”, “1\_2” and “2\_1” for group and replicate  
242 numbers. The methylation patterns of all genes and DMGs in different CpG island regions by  
243 `Group_cpfeature_boxplot()` and `Genebody_cpfeature_boxplot()` are shown in supplementary figure  
244 1. Results suggest that the methylation levels of DMGs were higher than before and they are the same  
245 of CpG islands higher than shores (Supplementary figure 1). The all dataset for genes  
246 (`regiongeneall_Qvalue`), genes with CpG island features (`regiongeneall_cpfeature_Qvalue`), gene  
247 bodies with CpG island features (`genefeatureall_cpfeature_Qvalue`) and cytosine sites  
248 (`genefeatureall_cpfeature_Qvalue`) after `Logic_regression()` are listed in Supplementary file 1, 2, 3  
249 and 4, respectively.

250 The methylation difference of all the cytosine sites involved in the gene were centralized to a mean,  
251 so statistical power seemed be lower than before (Figure 4 and Supplementary figure 2). In addition,  
252 *GeneDMRs* package can detect different gene body regions (e.g., promoter, exon and intron), CpG  
253 island regions (e.g., CpGi and shore regions) and their overlapped regions by  
254 `Methmean_region(cpfeaturefile = inputcpfeaturefile/NULL, featureid = "`  
255 `c("chr1","chr2")/all/alls", featurename = c("promoters","exons","introns","TSSes"))/c("CpGisland",`  
256 `"Shores"))` for different methylation mean calculations. According these results, we found that



257 *DNMT3A* was a hypo-methylated (NM\_001271753) gene but the gene and one intron interacted in  
258 both CpG island and shore features were in hyper-methylation status when G5 CMP was compared to  
259 G0 CMP (Supplementary file 1, 2 and 3). Therefore, *GeneDMRs* package can accurately find  
260 significantly and biologically methylated gene body and CpG island regions along the whole genome  
261 and supplement the previous research (Colla et al., 2015).

262 If we only use the DMCs to recalculate the methylation mean by replacing the RRBS cytosine sites,  
263 i.e., `DMC_methfile_QC(inputmethfile_QC, siteall_significant)`, the methylation difference will be  
264 more obvious than before (Supplementary figure 3). The DMC-based methylation levels could  
265 represent the whole methylations for gene-based regions when the DMCs in one gene are involved in  
266 the important parts that affect the transcription. For WGBS data, statistical efficiency can be  
267 potentially improved by removing globally unmethylated sites with less methylation differences,  
268 because the total number of hypotheses affects the  $Q$ -values by the rank of combined  $P$ -values (Huh  
269 et al., 2017). The global DMC-based methylation levels (Figure 5) can be realized by  
270 `Circos_plot(inputcytofile, inputmethfile_QC, inputrefseqfile, inputcpgfeaturefile)` based R package  
271 *RCircos* (Zhang et al., 2013).

### 272 **3.3 Biological enrichment for DMGs**

273 The enrichments for groups, GO terms and pathways can be analyzed and visualized with/without  
274 categories following R packages *clusterProfiler* (Yu et al., 2012). For example, the GO terms can be  
275 visualized in no/one/two categories (Figure 6) by incorporating hyper/hypo-methylated and up/down-  
276 regulated gene information. Thus, based on the DMGs and enrichments for GO term and pathway,  
277 *GeneDMRs* package can help to detect the specific significant regions, reveal the biological  
278 mechanism and enhance the previous studies that methylation pattern changes in specific-regions  
279 were involved in causing diseases (Colla et al., 2015).

280

## 281 **4. Summary**

282 Currently, there is no easy-to-use R package that could compute methylation levels at the gene based  
283 level. *GeneDMRs*, a user-friendly R package, can facilitate computing gene based methylation rate  
284 using NGS-based methylome data. This package aims to analyze the methylation levels in  
285 gene/promoter/exon/intron/CpG island/CpG island shore and their overlapped regions. Then, the  
286 differentially hyper/hypo-methylated genes can be visualized for enrichments of GO terms and  
287 pathways and reveal the biological mechanism accordingly. Such gene-based methylation analyses  
288 contributes to interpreting complex interplay between methylation levels and gene expression  
289 differences or similarities across physiological conditions or disease states.

## 290 **List of abbreviations**

- 291 **Adora1:** Adenosine A1 receptor gene
- 292 **CMP:** Common myeloid progenitor
- 293 **CpG:** Cytosine and guanine dinucleotide
- 294 **DEG:** Differentially expressed gene
- 295 **DMC:** Differentially methylated cytosine
- 296 **DMCpGi:** Differentially methylated CpG island
- 297 **DME:** Differentially methylated exon
- 298 **DMG:** Differentially methylated gene
- 299 **DMI:** Differentially methylated intron
- 300 **DMP:** Differentially methylated promoter
- 301 **DMR:** Differentially methylated region
- 302 **DMShore:** Differentially methylated CpG island shore
- 303 **DMW:** Differentially methylated window
- 304 **GeneDMRs:** Gene-based differentially methylated regions
- 305 **GEO:** Gene Expression Omnibus
- 306 **GRN:** Gene regulatory network
- 307 **LogFC:** Log fold change
- 308 **NCBI:** National Center for Biotechnology Information
- 309 **NGS:** Next generation sequencing
- 310 **PCR:** Polymerase chain reaction
- 311 **QC:** Quality control
- 312 **RRBS:** Reduced representation bisulfite sequencing
- 313 **UCSC:** University of California Santa Cruz
- 314 **WGBS:** Whole genome bisulfite sequencing

## 315 **Availability and Implementation**

316 GeneDMRs is freely available at <https://github.com/xiaowangCN/GeneDMRs>

## 317 **Author Disclosure Statement**

318 The authors declare that they have no competing interests.

## 319 **Funding Information**

320 This study was funded by Ph.D. Project in Department of Applied Mathematics and Computer  
321 Science, Technical University of Denmark, Denmark. Xiao Wang received Ph.D. stipends from the  
322 Technical University of Denmark, DTU Bioinformatics and DTU Compute, Denmark, and the China  
323 Scholarship Council, China.

## 324 **Author information**

### 325 **Affiliations**

326 *Quantitative Genomics, Bioinformatics and Computational Biology Group, Department of Applied*  
327 *Mathematics and Computer Science, Technical University of Denmark, Kongens Lyngby, Denmark*

328 Xiao Wang & Haja N. Kadarmideen

329 *College of Animal Science and Technology, Northwest A&F University, China. Department of*  
330 *Molecular Biology and Genetics, Aarhus University, Denmark.*

331 Dan Hao

### 332 **Contributions**

333 XW developed and implemented the method and *GeneDMRs* package, with supervision of HNK. DH  
334 gave feedback on package development and tested the final package. HNK interpreted the results  
335 from application of this package. XW wrote the manuscript. DH and HNK improved the manuscript.  
336 All authors read and approved the final manuscript.

### 337 **Corresponding authors**

338 Correspondence to Xiao Wang [xiwa@dtu.dk](mailto:xiwa@dtu.dk) or Haja N. Kadarmideen [hajak@dtu.dk](mailto:hajak@dtu.dk)

339

## 340 References

- 341 Akalin, A., Franke, V., Vlahoviček, K., et al. 2015. Genomation: A toolkit to summarize, annotate and  
342 visualize genomic intervals. *Bioinformatics*. 31, 1127-1129.
- 343 Akalin, A., Kormaksson, M., Li, S., et al. 2012. MethylKit: a comprehensive R package for the  
344 analysis of genome-wide DNA methylation profiles. *Genome Biol.* 13, R87.
- 345 Aryee, M.J., Jaffe, A.E., Corrada-Bravo, H., et al. 2014. Minfi: A flexible and comprehensive  
346 Bioconductor package for the analysis of Infinium DNA methylation microarrays. *Bioinformatics*. 30,  
347 1363-1369.
- 348 Assenov, Y., Müller, F., Lutsik, P., et al. 2014. Comprehensive analysis of DNA methylation data  
349 with RnBeads. *Nat. Methods*. 11, 1138-1140.
- 350 Benjamini, Y., Yekutieli, D. 2001. The control of the false discovery rate in multiple testing under  
351 dependency. *Ann. Stat.* 29, 1165-1188.
- 352 Bolger, A.M., Lohse, M., Usadel, B. 2014. Trimmomatic: A flexible trimmer for Illumina sequence  
353 data. *Bioinformatics*. 30, 2114–2120.
- 354 Cedoz, P.L., Prunello, M., Brennan, K., et al. 2018. MethylMix 2.0: An R package for identifying  
355 DNA methylation genes. *Bioinformatics*. 34, 3044-3046.
- 356 Colla, S., Ong, D.S.T., Ogoti, Y., et al. 2015. Telomere Dysfunction Drives Aberrant Hematopoietic  
357 Differentiation and Myelodysplastic Syndrome. *Cancer Cell*. 27, 644-657.
- 358 Rho J., Loewer, S., Miller, J., et al. 2009. Differential methylation of tissue- and cancer-specific CpG  
359 island shores distinguishes human induced pluripotent stem cells, embryonic stem cells and  
360 fibroblasts. *Nat. Genet.* 41, 1350-1353.
- 361 Frommer, M., McDonald, L.E., Millar, D.S., et al. 1992. A genomic sequencing protocol that yields a  
362 positive display of 5-methylcytosine residues in individual DNA strands. *Proc. Natl. Acad. Sci.* 89,  
363 1827-1831.
- 364 Gevaert, O. 2015. MethylMix: an R package for identifying DNA methylation-driven genes.  
365 *Bioinformatics*, 31, 1839-1841.
- 366 Goldberg, A.D., Allis, C.D., Bernstein, E. 2007. Epigenetics: A Landscape Takes Shape. *Cell*. 128,  
367 635-638
- 368 Hochberg, B. 1995. Controlling the False Discovery Rate: a Practical and Powerful Approach to  
369 Multiple Testing. *J. R. Stat. Soc.* 57, 289-300.
- 370 Hochberg, Y. 1988. A sharper bonferroni procedure for multiple tests of significance. *Biometrika*. 75,  
371 800-802.
- 372 Holm, S. 1979. A Simple Sequentially Rejective Multiple Test Procedure. *Scand. J. Stat.* 6, 65-70.
- 373 Hommel, G. 1988. A stagewise rejective multiple test procedure based on a modified bonferroni test.  
374 *Biometrika*. 75, 383-386.
- 375 Huh, I., Wu, X., Park, T., et al. 2017. Detecting differential DNA methylation from sequencing of  
376 bisulfite converted DNA of diverse species. *Brief. Bioinform.* 20, 33-46.
- 377 Irizarry, R.A., Ladd-Acosta, C., Wen, B., et al. 2009. The human colon cancer methylome shows  
378 similar hypo- and hypermethylation at conserved tissue-specific CpG island shores. *Nat. Genet.* 41,  
379 178-186.
- 380 Jones, P.A. 2012. Functions of DNA methylation: Islands, start sites, gene bodies and beyond. *Nat.*  
381 *Rev. Genet.* 13, 484-492.

- 382 Krueger, F., Andrews, S.R. 2011. Bismark: A flexible aligner and methylation caller for Bisulfite-Seq  
383 applications. *Bioinformatics*. 27, 1571-1572.
- 384 Laird, P.W. 2010. Principles and challenges of genome-wide DNA methylation analysis. *Nat. Rev.*  
385 *Genet.* 11, 191-203.
- 386 Langmead, B., Salzberg, S.L. 2012. Fast gapped-read alignment with Bowtie 2. *Nat. Methods*. 9, 357-  
387 359.
- 388 Lawson, J.T., Tomazou, E.M., Bock, C., et al. 2018. MIRA: an R package for DNA methylation-  
389 based inference of regulatory activity. *Bioinformatics*. 34, 2649-2650.
- 390 Meissner, A., Gnirke, A., Bell, G.W., et al. 2005. Reduced representation bisulfite sequencing for  
391 comparative high-resolution DNA methylation analysis. *Nucleic Acids Res.* 33, 5868-5877.
- 392 Müller, F., Scherer, M., Assenov Y., et al. 2019. RnBeads 2.0: Comprehensive analysis of DNA  
393 methylation data. *Genome Biol.* 20, 55.
- 394 Silva, T.C., Coetzee, S.G., Gull, N., et al. 2018. ELMER v.2: an R/Bioconductor package to  
395 reconstruct gene regulatory networks from DNA methylation and transcriptome profiles.  
396 *Bioinformatics*. 35, 1974-1977.
- 397 Suravajhala, P., Kogelman, L.J.A., Kadarmideen, H.N. 2016. Multi-omic data integration and analysis  
398 using systems genomics approaches: Methods and applications In animal production, health and  
399 welfare. *Genet. Sel. Evol.* 48, 38.
- 400 Taylor, D.L., Jackson, A.U., Narisu, N., et al. 2019. Integrative analysis of gene expression, DNA  
401 methylation, physiological traits, and genetic variation in human skeletal muscle. *Proc. Natl. Acad.*  
402 *Sci.* 116, 10883-10888.
- 403 Wang, D., Yan, L., Hu, Q., et al. 2012. IMA: An R package for high-throughput analysis of Illumina's  
404 450K Infinium methylation data. *Bioinformatics*. 28, 729-730.
- 405 Wang, X, Kadarmideen, H.N. 2019a. Genome-wide DNA methylation analysis using next-generation  
406 sequencing to reveal candidate genes responsible for boar taint in pigs. *Anim. Genet.* 50, 644-659.
- 407 Wang, X, Kadarmideen, H.N. 2019b. An epigenome-wide DNA methylation map of testis in pigs for  
408 study of complex traits. *Front. Genet.* 10, 405.
- 409 Yang, X., Han, H., DeCarvalho, D.D., et al. 2014. Gene body methylation can alter gene expression  
410 and is a therapeutic target in cancer. *Cancer Cell.* 26, 577-590.
- 411 Yu, G., Wang, L.G., Han, Y., et al. 2012. clusterProfiler: an R Package for Comparing Biological  
412 Themes Among Gene Clusters. *Omi. A J. Integr. Biol.* 16, 284-287.
- 413 Zhang, H., Meltzer, P., Davis, S. 2013. RCircos: An R package for Circos 2D track plots. *BMC*  
414 *Bioinformatics*. 14, 244.
- 415
- 416
- 417
- 418

419 **Tables**

420 Table 1. Comparisons of different R packages for methylation analysis.

| R package                                                                          | Target                                           | Analysis feature                                                                                                         | Issued time |
|------------------------------------------------------------------------------------|--------------------------------------------------|--------------------------------------------------------------------------------------------------------------------------|-------------|
| <i>ELMER v.2</i> (Silva et al., 2018)                                              | DMR                                              | Reconstruct altered gene regulatory network (GRN) by combining enhancer methylation and gene expression                  | 2018        |
| <i>IMA</i> (Wang et al., 2012)                                                     | Site-level and region-level methylation          | Summarization for individual site as well as annotated region                                                            | 2012        |
| <i>methyAnalysis</i>                                                               | DMR                                              | Chromosome location based DNA methylation analysis and heatmap plot with CpG island                                      | 2018        |
| <i>MethylationArrayAnalysis</i>                                                    | Probe-wise differential methylation and DMR      | Differential variability analysis, estimating cell type composition and gene ontology testing                            | 2019        |
| <i>MethylKit</i> (Akalin et al., 2012)                                             | Base or region of DNA methylation                | Functions for clustering, sample quality visualization, differential methylation analysis and annotation feature         | 2012        |
| <i>MethylMix</i> (Gevaert, 2015)<br><i>/MethylMix 2.0</i> (Cedoz et al., 2018)     | DMR of gene                                      | Automate the construction of DNA-methylation and gene expression dataset from The Cancer Genome Atlas (TCGA)             | 2015/2018   |
| <i>Minfi</i> (Aryee et al., 2014)                                                  | Differentially methylated position (DMP) and DMR | Block finding to identify hypomethylation block                                                                          | 2014        |
| <i>MIRA</i> (Lawson et al., 2018)                                                  | DMR                                              | Take advantage of genome-scale DNA methylation data to assess regulatory activity                                        | 2018        |
| <i>RnBeads</i> (Assenov et al., 2014)<br><i>/RnBeads 2.0</i> (Müller et al., 2019) | DMR of gene/promoter/CpG island                  | DNA methylation-based prediction of age and sex; LOLA-based region set enrichment analysis for biological interpretation | 2014/2019   |

421

422

423

424 **Figures**

425

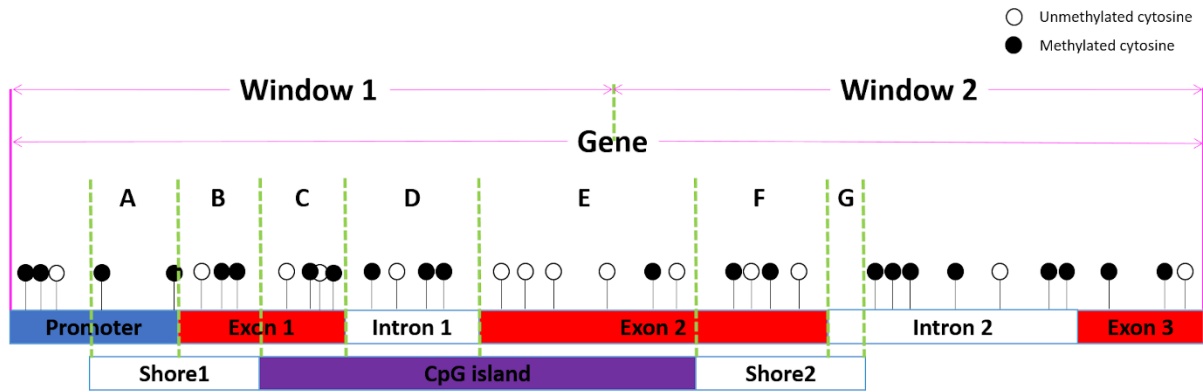

426

427 Figure 1. The analyzed targets in the *GeneDMRs* package including widows, genes (promoters, exons,  
428 introns), CpG islands (CpGis, Shores) and the overlapped feature regions (e.g., **A**: Promoter-Shore1,  
429 **B**: Exon1-Shore1, **C**: Exon1-CpGi, **D**: Intron1-CpGi, **E**: Exon2-CpGi, **F**: Exon2-Shore2, **A + B**:  
430 Gene-Shore1, **C + D + E**: Gene-CpGi, **F + G**: Gene-Shore2).

431

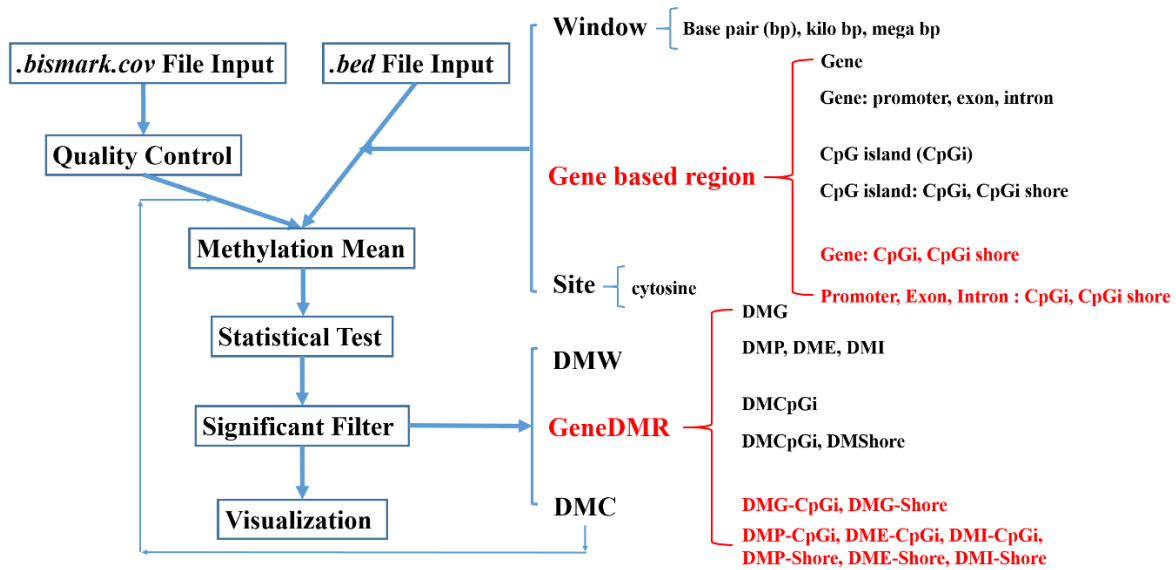

432

433 Figure 2. Overall workflow of *GeneDMRs* package.

434



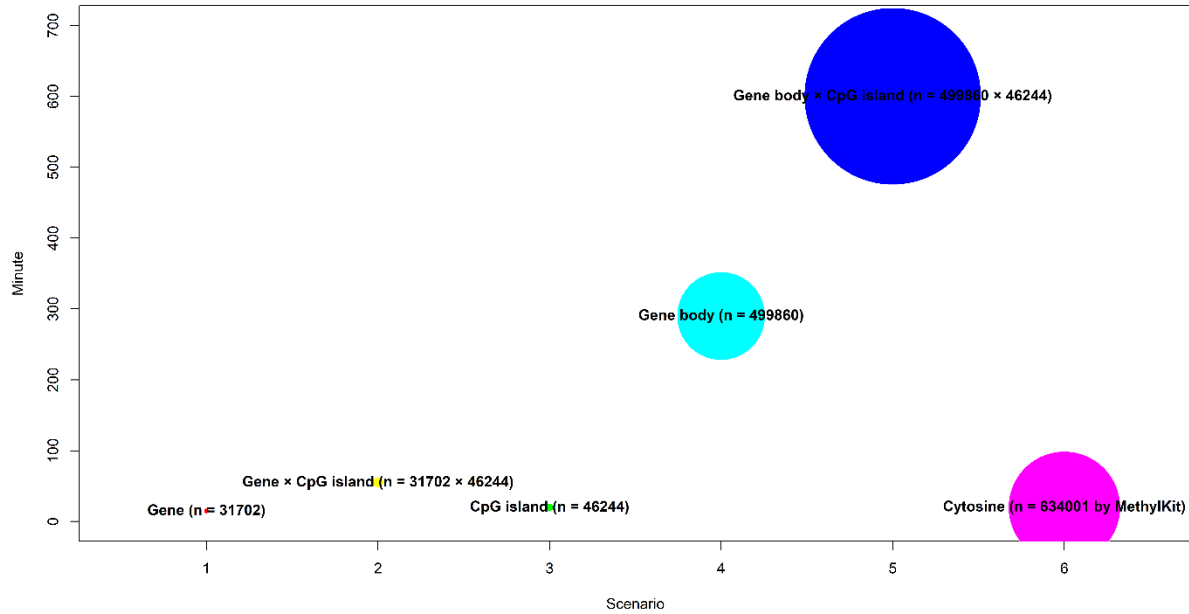

435

436 Figure 3. The performance of *GeneDMRs* package.

437

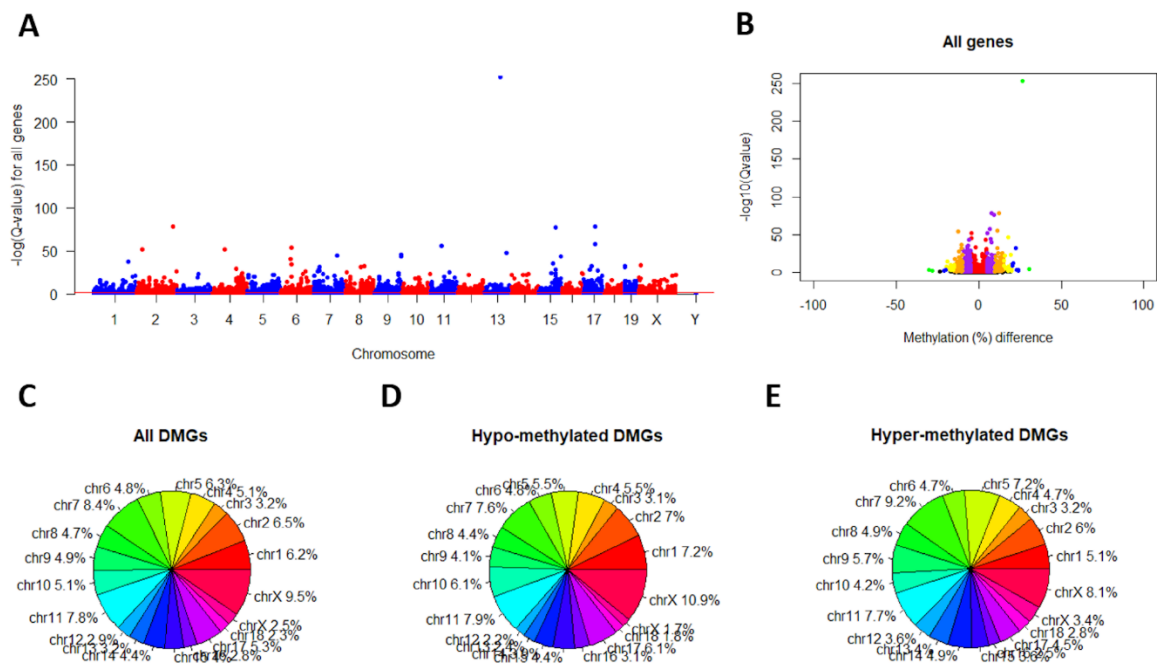

438

439 Figure 4. (A) Manhattan plots for all genes. Note: The red line indicates the significant level of Q-

440 value  $< 0.01$ . (B) Methylation differences in all genes. Note: Plots showing red, purple, orange,

441 yellow, blue and green colors indicate genes with a Q-value less than 0.01 and methylation difference

442 (%) greater than 0, 5, 10, 15, 20 and 25, respectively. (C), (D) and (E) Percentages of all, hypo-

443 methylated and hyper-methylated DMGs in different chromosomes, respectively.

444

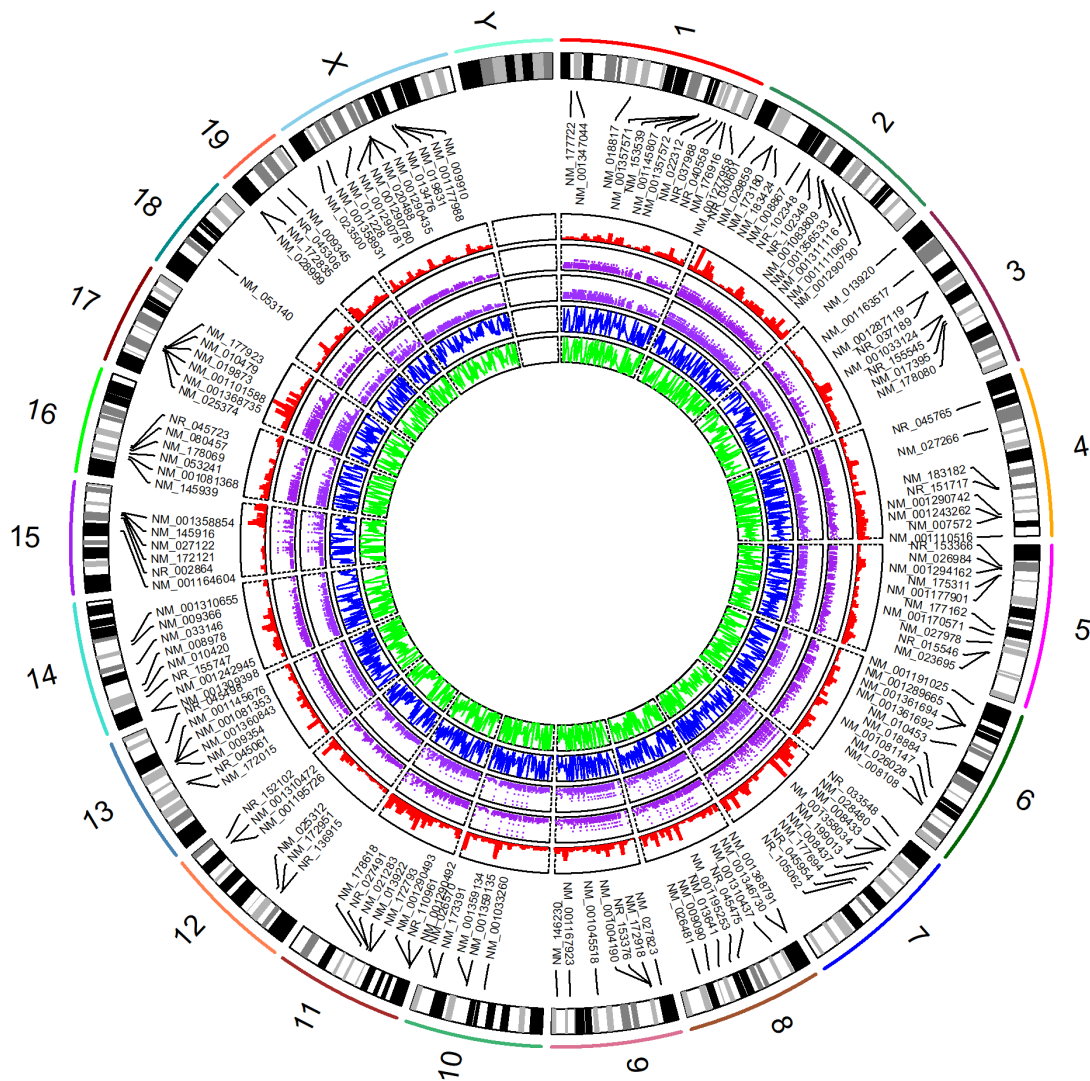

445

446 Figure 5. Circular graph of the global methylation levels. Note: From the outermost track to innermost  
447 circle, the circles indicate genome chromosomes (i.e., mouse), DMGs, gene densities, CpG island  
448 densities, CpG island shore densities and methylation levels. The densities and methylation levels  
449 were calculated by 1,000,000 base pair (bp) windows, i.e.,  $\text{Window\_divide}(\text{windowbp} = 1000000)$ .

450

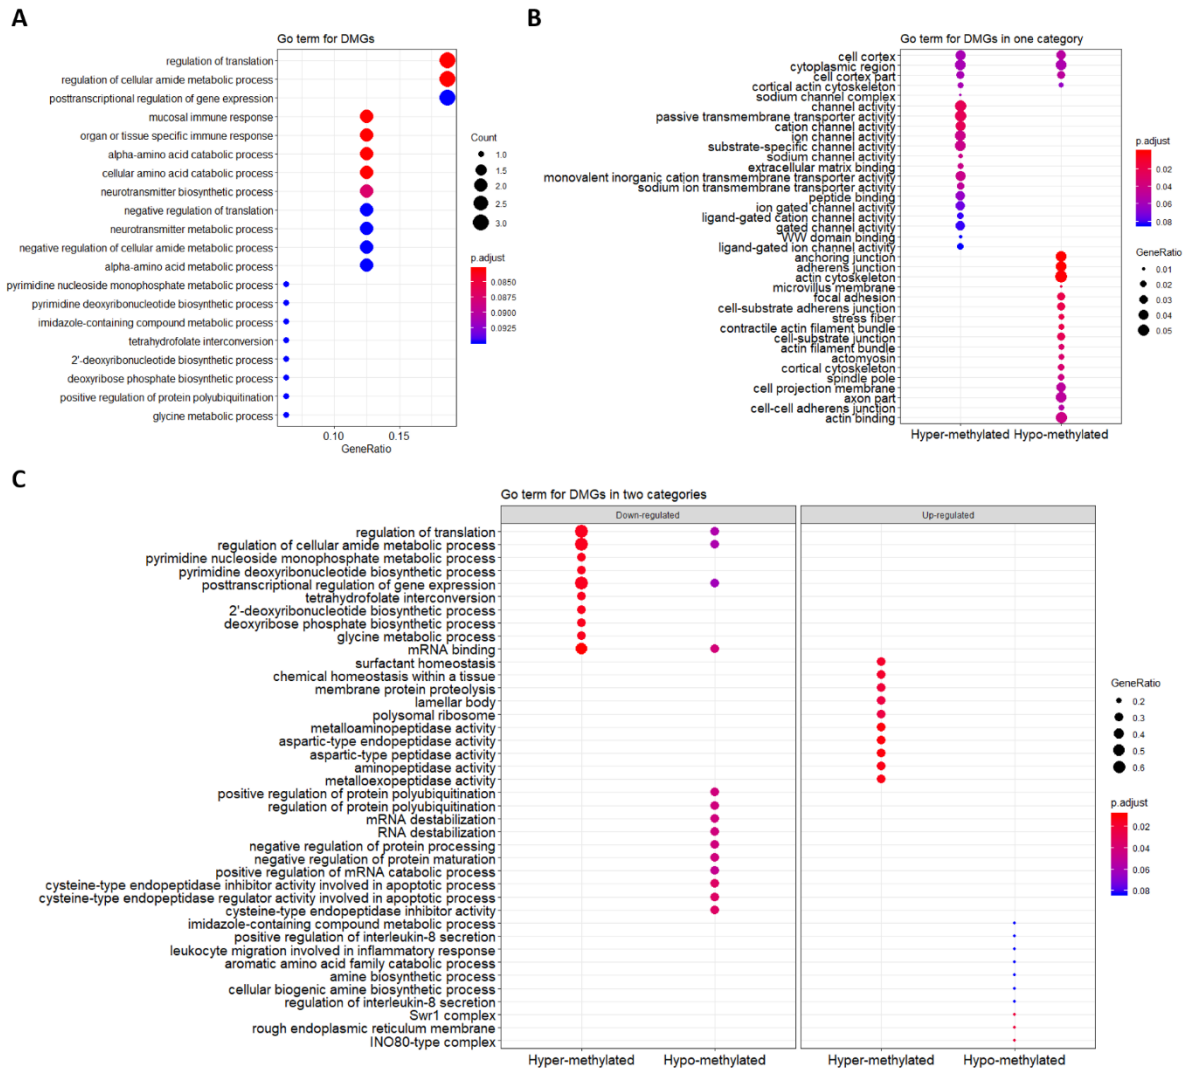

451

452 Figure 6. GO term enrichments. (A) GO terms without category. (B) GO terms with one category of  
 453 hyper/hypo-methylated genes. (C) GO terms with two categories of hyper/hypo-methylated and  
 454 up/down-regulated genes.

455

456

457

458

459

460

461

## 462 **Supplementary materials**

463 Supplementary table 1. Statistical summary of data source.

464 Supplementary figure 1. **(A)** Methylation patterns of all genes for different groups and gene bodies in  
465 different CpG island regions. **(B)** Methylation patterns of all DMGs for different groups and gene  
466 bodies in different CpG island regions. Note: P value is calculated by the methylation comparison  
467 between CpG island and CpG island shore with Student's t-tests.

468 Supplementary figure 2. **(A)** Manhattan plots for all cytosine sites. Note: The red line indicates the  
469 significant level of Q-value < 0.01. **(B)** Methylation differences in all cytosine sites. Note: Plots  
470 showing red, purple, orange, yellow, blue and green colors indicate genes with a Q-value less than  
471 0.01 and methylation difference (%) greater than 0, 5, 10, 15, 20 and 25, respectively. **(C)**, **(D)** and  
472 **(E)** Percentages of all, hypo-methylated and hyper-methylated cytosine sites/DMCs in different  
473 chromosomes/gene bodies/CpG islands, respectively.

474 Supplementary figure 3. **(A)** Heat map cluster for methylation levels of all DMGs (n = 246). **(B)** Heat  
475 map cluster for methylation levels of all DMC-based DMGs (n = 2022). Note: DMGs and DMC-  
476 based DMGs were filter by Significant\_filter(qvalue = 0.01, methdiff = 0.1).

477 Supplementary file 1. Details of 20,837 genes with chromosomes, positions, methylation levels, read  
478 numbers, P-values, Q-values and methylation differences.

479 Supplementary file 2. Details of 14,822 genes interacted by CpG island features with chromosomes,  
480 positions, methylation levels, read numbers, P-values, Q-values and methylation differences.

481 Supplementary file 3. Details of 41,562 gene bodies interacted by CpG island features with  
482 chromosomes, positions, methylation levels, read numbers, P-values, Q-values and methylation  
483 differences.

484 Supplementary file 4. Details of 634,001 cytosines with chromosomes, positions, methylation levels,  
485 read numbers, P-values, Q-values and methylation differences.

486
